RESEARCH ARTICLE

# Restoration of Responsiveness of Phospholipase Cy2-Deficient Platelets by Enforced Expression of Phospholipase Cy1

Yongwei Zheng<sup>1,2</sup>, Tamara Adams<sup>1</sup>, Huiying Zhi<sup>1</sup>, Mei Yu<sup>1</sup>, Renren Wen<sup>1</sup>, Peter J. Newman<sup>1,3,4</sup>, Demin Wang<sup>1,5</sup>, Debra K. Newman<sup>1,3,5\*</sup>

**1** Blood Research Institute, BloodCenter of Wisconsin, Milwaukee, Wisconsin, United States of America, **2** Key Laboratory of Developmental Genes and Human Disease, Ministry of Education, Institute of Life Science, Southeast University, Nanjing, Jiangsu, People's Republic of China, **3** Department of Pharmacology and Toxicology, Medical College of Wisconsin, Milwaukee, Wisconsin, United States of America, **4** Department of Cell Biology, Neurobiology and Anatomy, Medical College of Wisconsin, Milwaukee, Wisconsin, United States of America, **5** Department of Microbiology and Molecular Genetics, Medical College of Wisconsin, Milwaukee, Wisconsin, United States of America

\* [Debra.Newman@bcw.edu](mailto:Debra.Newman@bcw.edu)

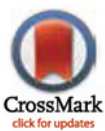

OPEN ACCESS

**Citation:** Zheng Y, Adams T, Zhi H, Yu M, Wen R, Newman PJ, et al. (2015) Restoration of Responsiveness of Phospholipase Cy2-Deficient Platelets by Enforced Expression of Phospholipase Cy1. PLoS ONE 10(3): e0119739. doi:10.1371/journal.pone.0119739

**Academic Editor:** Toshiyuki Miyata, National Cerebral and Cardiovascular Center, JAPAN

**Received:** September 18, 2014

**Accepted:** January 15, 2015

**Published:** March 20, 2015

**Copyright:** © 2015 Zheng et al. This is an open access article distributed under the terms of the [Creative Commons Attribution License](https://creativecommons.org/licenses/by/4.0/), which permits unrestricted use, distribution, and reproduction in any medium, provided the original author and source are credited.

**Data Availability Statement:** All relevant data are within the paper and its Supporting Information files.

**Funding:** This work was supported by National Institutes of Health Grant #P01 HL44612 (to DW, PJN and DKN) and #R01 AI079087 (to DW). The funders had no role in study design, data collection and analysis, decision to publish, or preparation of the manuscript.

**Competing Interests:** The authors have declared that no competing interests exist.

## Abstract

Receptor-mediated platelet activation requires phospholipase C (PLC) activity to elevate intracellular calcium and induce actin cytoskeleton reorganization. PLCs are classified into structurally distinct  $\beta$ ,  $\gamma$ ,  $\delta$ ,  $\epsilon$ ,  $\zeta$ , and  $\eta$  isoforms. There are two PLC $\gamma$  isoforms (PLC $\gamma$ 1, PLC $\gamma$ 2), which are critical for activation by tyrosine kinase-dependent receptors. Platelets express both PLC $\gamma$ 1 and PLC $\gamma$ 2. Although PLC $\gamma$ 2 has been shown to play a dominant role in platelet activation, the extent to which PLC $\gamma$ 1 contributes has not been evaluated. To ascertain the relative contributions of PLC $\gamma$ 1 and PLC $\gamma$ 2 to platelet activation, we generated conditionally PLC $\gamma$ 1-deficient, wild-type (WT), PLC $\gamma$ 2-deficient, and PLC $\gamma$ 1/PLC $\gamma$ 2 double-deficient mice and measured the ability of platelets to respond to different agonists. We found that PLC $\gamma$ 2 deficiency abrogated  $\alpha$ IIb $\beta$ 3-dependent platelet spreading, GPVI-dependent platelet aggregation, and thrombus formation on collagen-coated surfaces under shear conditions, which is dependent on both GPVI and  $\alpha$ IIb $\beta$ 3. Addition of exogenous ADP overcame defective spreading of PLC $\gamma$ 2-deficient platelets on immobilized fibrinogen, suggesting that PLC $\gamma$ 2 is required for granule secretion in response to  $\alpha$ IIb $\beta$ 3 ligation. Consistently,  $\alpha$ IIb $\beta$ 3-mediated release of granule contents was impaired in the absence of PLC $\gamma$ 2. In contrast, PLC $\gamma$ 1-deficient platelets spread and released granule contents normally on fibrinogen, exhibited normal levels of GPVI-dependent aggregation, and formed thrombi normally on collagen-coated surfaces. Interestingly, enforced expression of PLC $\gamma$ 1 fully restored GPVI-dependent aggregation and  $\alpha$ IIb $\beta$ 3-dependent spreading of PLC $\gamma$ 2-deficient platelets. We conclude that platelet activation through GPVI and  $\alpha$ IIb $\beta$ 3 utilizes PLC $\gamma$ 2 because PLC $\gamma$ 1 levels are insufficient to support responsiveness, but that PLC $\gamma$ 1 can restore responsiveness if expressed at levels normally achieved by PLC $\gamma$ 2.

## Introduction

PLC-mediated hydrolysis of plasma membrane phosphatidylinositol 4,5-bisphosphate (PIP<sub>2</sub>) to generate inositol 1,4,5-trisphosphate (IP<sub>3</sub>) and diacylglycerol (DAG) is critical for receptor-mediated cellular activation.[1] IP<sub>3</sub> triggers Ca<sup>2+</sup> mobilization by binding to its receptor on the endoplasmic reticulum in nucleated cells or on the dense tubular system in platelets.[2, 3] DAG is responsible for activation of protein kinase C (PKC), which can further stimulate cytoskeletal rearrangements.[4, 5] As shown in Fig. 1A, mammalian PLCs are grouped on the basis of structure into six different isoforms, including PLC $\beta$ ,  $\gamma$ ,  $\delta$ ,  $\epsilon$ ,  $\zeta$  and  $\eta$ . [6, 7] All PLC isoforms contain two highly conserved regions, referred to as X and Y, which together comprise the catalytic domain responsible for generation of the secondary messengers IP<sub>3</sub> and DAG.[8] PLC $\gamma$  isoforms have unique features that distinguish them from other PLC isoforms. These include two Src homology 2 (SH2) domains and one Src homology 3 (SH3) domain, which are localized between the X and Y catalytic regions and which mediate associations with effector molecules that contain phosphorylated tyrosine residues and proline-rich sequences, respectively. [8–10] There are two members of the PLC $\gamma$  family, including PLC $\gamma$ 1 and PLC $\gamma$ 2 (Fig. 1B). Whereas PLC $\gamma$ 1 is expressed ubiquitously, PLC $\gamma$ 2 expression is limited to cells of the hematopoietic lineage.[1] Both PLC $\gamma$ 1 and PLC $\gamma$ 2 function downstream of immune and adhesion receptors that are coupled to immunoreceptor tyrosine-based activation motif (ITAM)-containing subunits. In addition, PLC $\gamma$ 1 functions downstream of receptor tyrosine kinases, such as fibroblast growth factor receptor (FGF-R) and platelet-derived growth factor receptor (PDGF-R).[11] Homozygous disruption of the PLC $\gamma$ 1 gene in mice results in lethality at embryonic day 9,[12] indicating that PLC $\gamma$ 1 plays an essential role in cell growth, differentiation and development. Deficiency of PLC $\gamma$ 2 in mice does not cause embryonic lethality; however, PLC $\gamma$ 2-deficient mice exhibit abnormalities in B cell development and function, separation of blood from lymphatic vessels, and platelet function.[13, 14]. PLC $\gamma$ 1 and PLC $\gamma$ 2 are expressed at different levels in different cell types and at different stages of development. Consequently, the extent to which these enzymes are capable of functioning redundantly cannot be determined from studies of knockout mice that fail to express one or the other isoform.

Platelets possess four major tyrosine kinase-dependent receptors capable of inducing shape change, granule secretion and aggregation following ligand binding. These include the glycoprotein (GP)Ib-IX-V receptor for von Willebrand factor, the GPVI receptor for collagen and laminin, the integrin  $\alpha$ IIB $\beta$ 3, which serves as the platelet-specific receptor for fibrinogen and CLEC-2, which is the receptor for podoplanin on lymphatic endothelium and the snake venom rhodocytin. Engagement of these receptors results in a series of tyrosine phosphorylation events that culminates in activation of PLC $\gamma$ , generation of IP<sub>3</sub> and DAG, and platelet responsiveness.[15, 16] The role of PLC $\gamma$ 2 in these processes has been evaluated by studying PLC $\gamma$ 2-deficient (PLC $\gamma$ 2<sup>-/-</sup>) mice, which exhibited a prolonged bleeding time [17] and defective thrombus formation following laser injury of mesenteric arterioles *in vivo* [18], and in which GPVI- and CLEC-2-dependent platelet responses were abolished.[17, 19–21] These findings established that PLC $\gamma$ 2 is indispensable for GPVI-mediated platelet activation. With respect to  $\alpha$ IIB $\beta$ 3-mediated platelet responses, formation of filopodia and lamellipodia by mouse platelets on fibrinogen-coated surfaces was dramatically inhibited in the absence of PLC $\gamma$ 2 and, consistent with these morphological defects, PLC $\gamma$ 2<sup>-/-</sup> platelets exhibited minimal calcium flux and phosphatidic acid production following adhesion to fibrinogen.[22, 23] Furthermore, relative to platelets from wild-type mice, platelets from PLC $\gamma$ 2-deficient mice formed less stable thrombi on fibrinogen under flow conditions and were impaired in their ability to retract a fibrin clot. [22, 24] These findings suggest that PLC $\gamma$ 2 plays an important, but not indispensable, role

### A. Structural homology of mammalian PLC isoforms

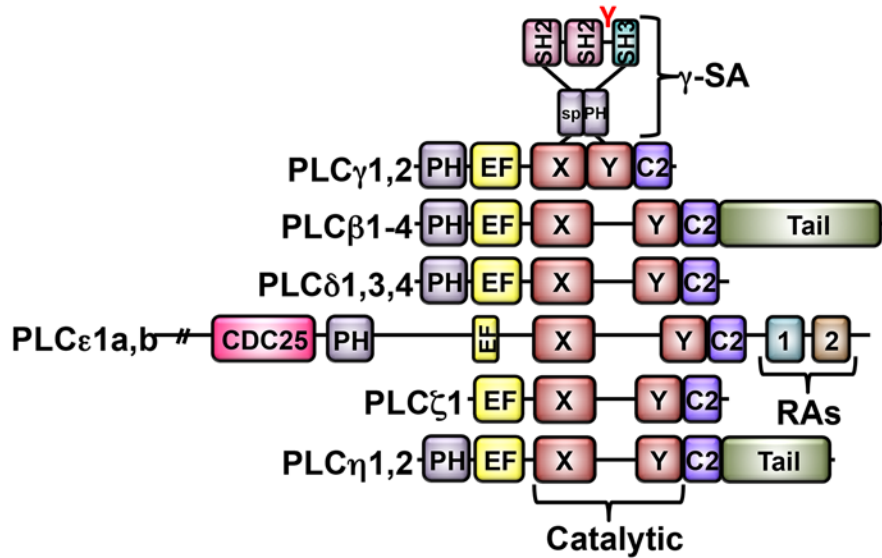

### B. PLCγ1 and PLCγ2 amino acid sequence identity and homology

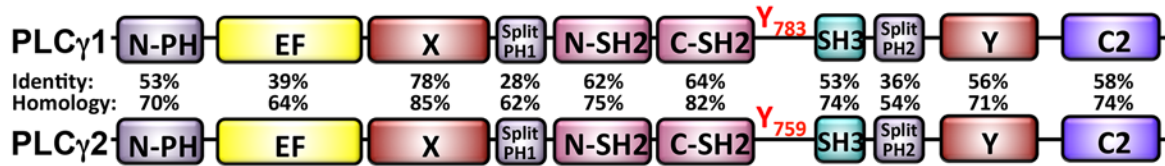

Adapted from Bunney, TD and M Katan, TIBS 36:88, 2011

**Fig 1. Key structural differences between PLC isoforms.** (A) Domain organization of PLC family members, all of which possess an N-terminal pleckstrin homology (PH) domain (light purple), EF hands (yellow), split catalytic X and Y domains (red), and a C-terminal C2 domain (dark purple). PLCγ isoforms possess a γ-specific array (γ-SA) that encompasses a split PH domain, two Src homology (SH) 2 domains (pink), one SH3 domain (teal) and an activating tyrosine (Y) phosphorylation site. PLCβ and PLCη family members possess unique C-terminal tails (green). PLCε possesses a unique N-terminal CDC25 domain (pink) and two Ras-association (RA) domains (teal and brown) at the C-terminus. Schematic is adapted from reference #7. (B) Degree of amino acid sequence identity and homology for each domain of PLCγ1 and PLCγ2.

doi:10.1371/journal.pone.0119739.g001

in αIIbβ3-mediated platelet activation, and raise the possibility that the low levels of PLCγ1 that are present in platelets are able to support platelet activation by αIIbβ3.

The embryonic lethality of PLCγ1-deficient mice has heretofore precluded assessment of the role of PLCγ1 in platelet function.[12] However, a mouse model that allows for conditional deletion of the PLCγ1 gene has recently been generated.[25] In the present study, we used conditionally PLCγ1- and PLCγ1/γ2-deficient mice, along with a retrovirus-mediated gene transfer and bone marrow reconstitution strategy, to dissect the extent to which PLCγ1 contributes to platelet activation. We found that platelet activation by the tyrosine kinase-dependent adhesion receptors GPVI and αIIbβ3 normally requires PLCγ2 because the levels at which PLCγ1 is expressed are limiting. If over-expressed, however, PLCγ1 can fully support platelet activation by these receptors. The full functional redundancy of PLCγ1 and PLCγ2 that is characteristic of platelets is unique amongst hematopoietic cells.

## Materials and Methods

### Mice

PLC $\gamma$ 1-floxed mice (PLC $\gamma$ 1<sup>fl/fl</sup>) and PLC $\gamma$ 2<sup>-/-</sup> mice on a C57BL/6 genetic background have been previously described.[14, 25] To generate PLC $\gamma$ 1<sup>fl/fl</sup> Mx1Cre or PLC $\gamma$ 1<sup>fl/fl</sup> PLC $\gamma$ 2<sup>-/-</sup> Mx1Cre mice, PLC $\gamma$ 1<sup>fl/+</sup> or PLC $\gamma$ 1<sup>fl/+</sup> PLC $\gamma$ 2<sup>+/-</sup> mice were bred with Mx1Cre mice (Jackson Laboratory stock 005673). To induce the expression of Cre recombinase, 8–10 week old PLC $\gamma$ 1<sup>+/+</sup>Mx1Cre, PLC $\gamma$ 1<sup>fl/fl</sup>Mx1Cre, PLC $\gamma$ 2<sup>-/-</sup>Mx1Cre and PLC $\gamma$ 1<sup>fl/fl</sup>PLC $\gamma$ 2<sup>-/-</sup>Mx1Cre mice were administered intraperitoneal injections of 0.3 mg of poly(I:C) (Amersham) twice at 2-day intervals. To generate bone marrow chimeric mice, bone marrow cells from these mice were harvested two weeks after poly(I:C) treatment and injected into lethally irradiated (1100 rads) 8-week old C57BL/6 CD45.1 congenic mice (Jackson Laboratory stock 002014). Eight weeks after bone marrow transplantation, chimeric mice were used for platelet experiments. Mice were maintained in the Biological Resource Center at the Medical College of Wisconsin (MCW). All animal protocols were approved by the MCW Institutional Animal Care and Use Committee.

### Antibodies and reagents

Antibodies specific for Syk (N-19 #sc-1077), PLC $\gamma$ 1 (1249, #sc-81) and PLC $\gamma$ 2 (Q-20, #sc-407) were purchased from Santa Cruz Biotechnology. The anti-FLAG antibody (M2, #A8592) and TRITC-conjugated phalloidin (#77418) were purchased from Sigma Aldrich. Collagen for platelet aggregation was purchased from Chrono-Log Corporation. Thrombin receptor activating peptide (TRAP; amino acid sequence SFLLRN) was synthesized by the Protein Chemistry Core Laboratory at the Blood Research Institute of BloodCenter of Wisconsin.

### Expression of recombinant truncated PLC $\gamma$ 1 and PLC $\gamma$ 2 proteins in COS-7 cells

COS-7 cells were transfected with rPLC $\gamma$ 1 $\Delta$ PHnFL-PRK5 or rPLC $\gamma$ 2 $\Delta$ PH-EFnFL-PRK5 plasmids (0.5  $\mu$ g plasmid/10<sup>5</sup> cells). After 48 hours, transfected cells were lysed in 500  $\mu$ l cell lysis buffer (20 mM TrisHCl, 50 mM NaCl, 5 mM EDTA, 1% Triton-100, 3  $\mu$ g/ml aprotinin, 2  $\mu$ g/ml pepstatin A, 1  $\mu$ g/ml leupeptin) for 30 min on ice. Lysates were mixed with an equal volume of 2X SDS loading buffer, boiled for 5 min, separated by SDS-PAGE, and subjected to Western blot analysis.

### Preparation of washed platelets

Mouse blood was drawn from the inferior vena cava of anesthetized mice into a syringe containing 3.8% sodium citrate (1/10 volume), then diluted 1:1 with Tyrode's buffer (137 mM NaCl, 13.8 mM NaHCO<sub>3</sub>, 2.5 mM KCl, 0.36 mM NaH<sub>2</sub>PO<sub>4</sub>, 20 mM HEPES, and 0.1% glucose). Diluted whole blood was supplemented with 50 ng/ml prostaglandin E1 (PGE<sub>1</sub>) and spun at 200g for 8 minutes at room temperature without brakes. Platelet-rich plasma (PRP) was collected and, after the addition of 50 ng/ml PGE<sub>1</sub>, platelets were pelleted at 800g for 8 minutes. Platelets were washed in Tyrode's buffer containing 50 ng/ml PGE<sub>1</sub> and 1 mM EDTA and spun at 800g for 8 minutes. Washed platelets were finally resuspended in Tyrode's buffer to the indicated final concentration.

Highly purified platelets were obtained by depleting washed mouse platelets, prepared as described above, of contaminating leukocytes and erythrocytes. Briefly, 10  $\mu$ l each of anti-CD45 and anti-Ter-119 Microbeads (Miltenyi) were added to washed mouse platelets (10<sup>7</sup> platelets/90  $\mu$ l) and allowed to incubate at 4°C for 15 minutes, after which 2 ml of Miltenyi Buffer 1 was

added and the suspension was centrifuged at 300 g for 10 min. The supernatant was completely removed and the pelleted platelets and microbeads were suspended in Buffer 1. An LS Column (Miltenyi) was placed in a MACS Separator magnetic field and rinsed with 3 ml of Buffer 1 (1x PBS with 1% BSA), after which the platelet/microbead suspension was applied to the column. Platelets, to which anti-CD45 and anti-Ter-119 do not bind, were collected in the effluent. The column was washed with 3 times with 3 ml of Buffer 1 and the total effluent was collected. Flow cytometry was used to confirm the absence T cells, B cells, and monocytes in the highly purified platelet population (data not shown). Highly purified platelets were lysed in an equal volume of 2x lysis buffer. Undiluted and 1:70 diluted platelet lysates were used for Western blot analysis of PLC $\gamma$ 1 and PLC $\gamma$ 2 expression levels, respectively.

### Immunoblot analysis

For biochemical analyses, washed platelets were lysed directly with 2X immunoprecipitation (IP) buffer (300 mM NaCl, 20mM Tris, 10 mM EDTA, 2 mM Na<sub>3</sub>VO<sub>4</sub>, 2% NP40; pH7.6) containing 2% protease inhibitor (Thermo Scientific) and phosphatase inhibitor (EMD Millipore) cocktails. Platelet lysates were subjected to SDS-polyacrylamide gel electrophoresis and immunoblot analysis. Tyrosine kinase Syk was chosen as a loading control in the immunoblot analysis, as Syk is highly expressed in platelets and plays a key role in platelet signal transduction.

### Collagen-induced platelet aggregation

Platelet aggregation assays were performed using a lumi-aggregometer (Chrono-Log). Washed platelets (300  $\mu$ l) at a concentration of  $1 \times 10^8$ /ml in Tyrode's buffer containing 1 mM CaCl<sub>2</sub> were added to a siliconized glass cuvette and stirred at 1000 rpm for 30 seconds at 37°C. Platelet activation was initiated by addition of 6  $\mu$ g/ml or 50  $\mu$ g/ml collagen. After allowing platelets to aggregate in response to collagen for 5 minutes, TRAP (5  $\mu$ g/ml) was added to the same cuvette as a positive control.

### *In vitro* thrombus formation under flow conditions

Thrombus formation was evaluated by perfusing whole blood over collagen-coated micro-channels under arterial shear conditions. Briefly, Vena8 FLUORO+ Biochips (Cellix Ltd) were coated overnight at 4°C with fibrillar collagen (50  $\mu$ g/ml) and blocked with Hank's Balancing Salt Solution containing 0.1% BSA. Whole blood from the various mice to be tested was anti-coagulated with heparin and PPACK, labeled with mepacrine (CalBiochem), and perfused over collagen-coated micro-channels at a shear rate of  $1333\text{s}^{-1}$ . Images of platelet adhesion and thrombus formation were acquired by epifluorescence microscopy in real time at a frame rate of one frame per second. Quantification of thrombus formation is reported as the mean integrated fluorescence intensity (IFI) per  $\mu\text{m}^2$ . Image analysis was performed using Metamorph software (Universal Imaging).

### Platelet spreading on immobilized fibrinogen

Eight-chamber glass tissue-culture slides (Becton Dickinson) were coated with 3  $\mu$ g/ml fibrinogen (Fg) or 1% bovine serum albumin (BSA) that had been pre-cleared of IgG using protein G beads in PBS at 4°C overnight. Wells were blocked with 1% BSA for 1 hour at room temperature prior to cell spreading. Washed platelets (200  $\mu$ l) at a concentration of  $7.5 \times 10^6$ /ml in Tyrode's buffer supplemented with 1 mM CaCl<sub>2</sub> and 2 mM MgCl<sub>2</sub> were allowed to spread on immobilized Fg or BSA for the indicated periods of time at 37°C. In some cases, ADP (Bio/DATA Corporation) was added at a final concentration of 20  $\mu\text{M}$ . Non-adherent platelets



were removed by washing slides with 37°C PBS 3 times. The remaining adherent platelets were fixed with 3% paraformaldehyde/PBS for 30 minutes and permeabilized for 5 minutes at room temperature with 0.5% NP40/PBS. Slides containing adherent platelets were blocked with 3% BSA at room temperature for 1 hour and then stained with phalloidin-TRITC (1  $\mu$ g/ml) at 4°C overnight. Samples were mounted in Vectashield mounting medium (Vector Laboratories). Images were acquired with a Photometrics SenSys camera (Photometrics) using a Zeiss Axio-cop microscope (Carl Zeiss) with a Zeiss 60 x lens (0.7 numeric aperture) and analyzed using Metamorph software (Universal Imaging). Results are reported as the mean area of spread platelets ( $\mu\text{m}^2$ /platelet on immobilized Fg— $\mu\text{m}^2$ /platelet on BSA) and the mean percent of platelet spreading (number of spread platelets/total number of platelets x 100), where spread platelets were defined as those with pseudopodia.[22]

### Platelet factor 4 (PF4) ELISA

Washed platelets (200  $\mu$ l) at a concentration of  $7.5 \times 10^6$ /ml were allowed to spread on 8-chamber glass tissue-culture slides coated with 3  $\mu$ g/ml Fg or 1% BSA for 1 hour at 37°C. Supernatants were collected and spun at 800 g for 5 minutes. The concentration of PF4 in each sample as determined using the Mouse CXCL4/PF4 Quantikine ELISA kit (R&D systems).

### Retroviral Transduction and Bone Marrow Transplantation

Retroviral transduction and bone marrow transplantation were performed as previously described.[26] Briefly, the rat PLC $\gamma$ 1 or rat PLC $\gamma$ 2 gene was cloned into a bicistronic retrovirus MSCV-IRES-GFP vector, in which expression of the cloned gene and green fluorescent protein (GFP) is under the control of the murine stem cell virus promoter. GFP fluorescence is used as a marker for identification of retrovirally transduced cells. Conditioned media containing high-titer, amphotropic retrovirus particles were derived by cotransfection of 293T cells with the retrovirus vector expressing the cloned gene and GFP and with a pEQPAM3 helper plasmid containing the required gag, pol, and env retroviral genes. This media was used to transduce ecotropic packaging cells (GP+E86) with 6  $\mu$ g/ml polybrene (Sigma). Cells exhibiting high GFP expression were sorted and subsequently expanded as virus-producing cells. Mouse bone marrow cells were transduced with retrovirus as follows: PLC $\gamma$ 1/ $\gamma$ 2 double-deficient mice (8 to 12 weeks old) were injected intraperitoneally with 150 mg/kg of 5-fluorouracil 48 hours before bone marrow harvest. Bone marrow cells were isolated and prestimulated with 20 ng/ml of IL3, 50 ng/ml of IL6 and 50 ng/ml stem cell factor (SCF) for 48 hours. Cells were then co-cultured on irradiated ecotropic producer cells (GP+E86) in the presence of IL3, IL6, SCF and polybrene (6  $\mu$ g/ml). After 48 hours, 1 to 2  $\times 10^6$  bone marrow cells were introduced via tail vein injection into lethally irradiated (1100 rads) 8-week old C57BL/6 wild-type mice (Jackson Laboratory stock 000664). Eight weeks later, mice were used for platelet studies.

### Statistical analysis

Statistically significant differences were identified by performing a one-way ANOVA followed by a two-tailed unpaired Student's t test using Graphpad Prism 6.0 software.

### Ethics Statement

Mice were maintained in a facility free of well-defined pathogens under the supervision of the Biological Resource Center at the Medical College of Wisconsin. All animal protocols were approved by the Institutional Animal Care and Use Committee of the Medical College of Wisconsin (Protocols #AUA00000952 and AUA00000929). For the experiments reported in this

manuscript, mice were anesthetized with a lethal injection of a mixture of ketamine and xylazine or with isoflurane inhalation. Blood was drawn from the inferior vena cava and organs and tissues were removed from unconscious mice, after which mice were euthanized by cervical dislocation or carbon dioxide inhalation.

## Results

### PLC $\gamma$ 2 is 400X more abundant than PLC $\gamma$ 1 in murine platelets

Platelets have been reported to express up to four times more PLC $\gamma$ 2 than PLC $\gamma$ 1 at the transcript level [27]; however, the relative abundance of PLC $\gamma$ 1 and PLC $\gamma$ 2 protein has not yet been determined. We used a quantitative Western blotting strategy to determine the relative levels of expression of PLC $\gamma$ 1 and PLC $\gamma$ 2 protein in mouse platelets. We first determined the relative affinities of Western blotting PLC $\gamma$ 1- and PLC $\gamma$ 2-specific antibodies for their respective targets. To accomplish this, a 130 kDa N-terminally flag-tagged mutant form of rat PLC $\gamma$ 1, in which the pleckstrin homology (PH) domain was deleted (rPLC $\gamma$ 1 $\Delta$ PHnFL), and a 107 kDa flag-tagged mutant form of rat PLC $\gamma$ 2, in which both the PH and EF domains were deleted (rPLC $\gamma$ 2 $\Delta$ PH-EFnFL), were over-expressed separately in COS-7 cells. Transfected COS-7 cell lysates with equal amounts of rPLC $\gamma$ 1 $\Delta$ PHnFL and rPLC $\gamma$ 2 $\Delta$ PH-EFnFL were mixed, serially diluted and subjected to Western blot analysis with antibodies specific for the flag tag to confirm equal loading of the two proteins (Fig. 2A). The same samples were then subjected to Western blot analysis using a mixture of antibodies specific for PLC $\gamma$ 1 or PLC $\gamma$ 2, each of which binds to the C-terminus of its target (and therefore is not affected by the PH or PH-EF deletion) and does not cross-react with the other isoform. Densitometric analysis of the PLC $\gamma$ 1-/PLC $\gamma$ 2 blots of COS-7 cell lysates revealed that the PLC $\gamma$ 1-specific antibody recognized rPLC $\gamma$ 1 $\Delta$ PHnFL an average of ~3 times better than the PLC $\gamma$ 2-specific antibody recognized rPLC $\gamma$ 2 $\Delta$ PH-EFnFL (Fig. 2B). To quantify the relative levels of PLC $\gamma$ 1 and PLC $\gamma$ 2 protein in platelets, increasing amounts of undiluted or 1:70 diluted lysates of highly purified mouse platelets were subjected to Western blot analysis with antibodies specific for PLC $\gamma$ 1 or PLC $\gamma$ 2, respectively. As shown in Fig. 2C, densitometric analysis of the PLC $\gamma$ 1/PLC $\gamma$ 2 blots of platelet lysates revealed that approximately 140 times more platelet lysate was required to achieve a PLC $\gamma$ 1 band intensity equivalent to that of PLC $\gamma$ 2 (e.g., the PLC $\gamma$ 1 band intensity in 10  $\mu$ l of undiluted platelet lysate was equivalent to the PLC $\gamma$ 2 band intensity observed with 5  $\mu$ l of 1:70 diluted platelet lysate). Together with the finding that anti-PLC $\gamma$ 1 recognizes PLC $\gamma$ 1 approximately 3 times better than anti-PLC $\gamma$ 2 recognizes PLC $\gamma$ 2, we conclude that mouse platelets have ~400X less PLC $\gamma$ 1 than PLC $\gamma$ 2 (~140X more lysate required for equivalent density of PLC $\gamma$ 1 relative to PLC $\gamma$ 2 bands x ~3X better recognition of PLC $\gamma$ 1 than PLC $\gamma$ 2).

### Collagen-induced platelet activation and thrombus formation are severely impaired in the absence of PLC $\gamma$ 2 but unaffected by the absence of PLC $\gamma$ 1

PLC $\gamma$ 2 deficiency has previously been shown to dramatically impact platelet activation via the collagen-GPVI signaling pathway; [17–20] however, the effect of PLC $\gamma$ 1 deficiency on GPVI-induced platelet activation has not previously been evaluated. To investigate the role of PLC $\gamma$ 1 in collagen-induced platelet activation, we generated PLC $\gamma$ 1-deficient and PLC $\gamma$ 1/ $\gamma$ 2 double-deficient mice and compared their responses to those of platelets derived from wild-type control and PLC $\gamma$ 2-deficient mice. Western blot analysis (Fig. 3A) verified that PLC $\gamma$ 1-deficient platelets expressed wild-type levels of PLC $\gamma$ 2 but no PLC $\gamma$ 1, PLC $\gamma$ 2-deficient platelets expressed wild-type levels of PLC $\gamma$ 1 but no PLC $\gamma$ 2 and PLC $\gamma$ 1/ $\gamma$ 2 double-deficient platelets failed to

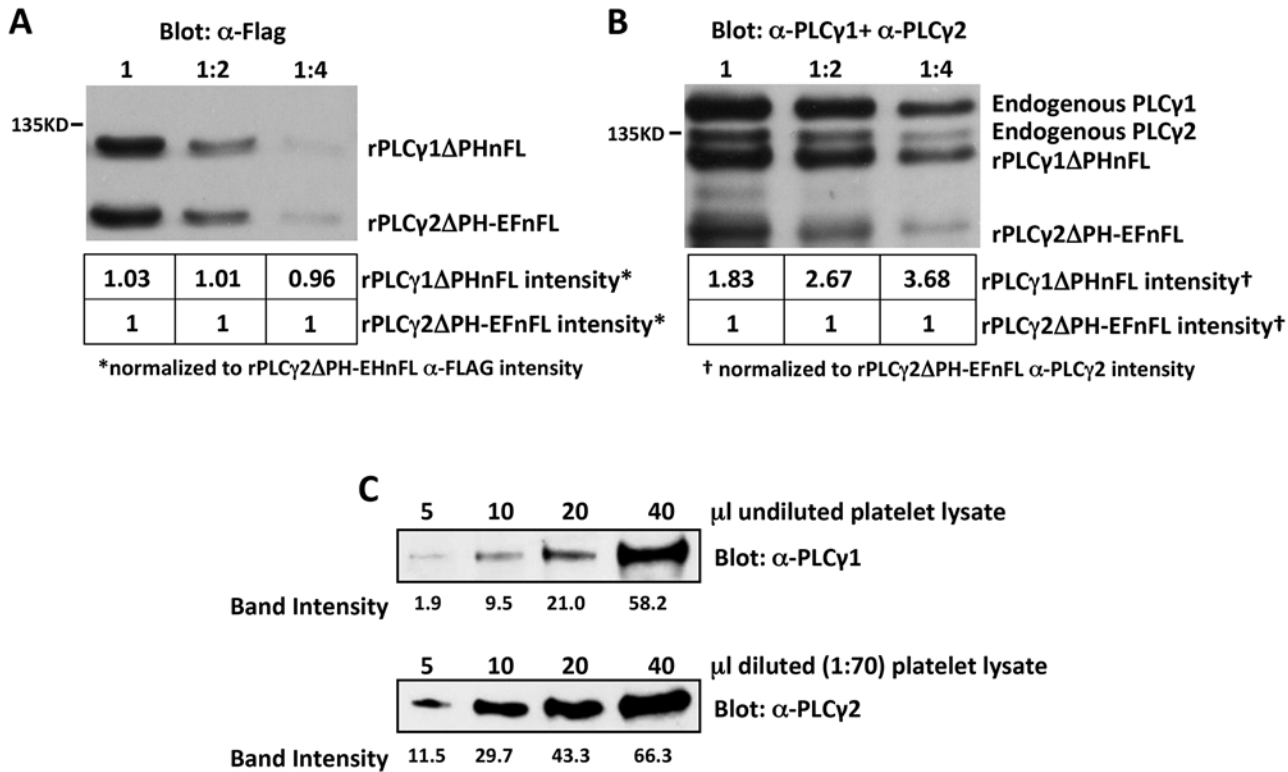

**Fig 2. Quantification of relative levels of PLCγ1 and PLCγ2 in mouse platelets.** (A and B) Lysates were prepared from COS-7 cells transfected with a plasmid encoding a FLAG-tagged form of either PLCγ1 in which the pleckstrin homology domain was deleted (rPLCγ1ΔPHnFL) or PLCγ2 in which the PH domain and EF hands were deleted (rPLCγ2ΔPH-EFnFL) and mixed. (A) Serial two-fold dilutions of the mixed COS-7 lysates were subjected to Western blot analysis with antibodies specific for the FLAG tag. Numbers under each lane indicate the densities of the rPLCγ1ΔPHnFL and rPLCγ2ΔPH-EFnFL bands relative to that of the rPLCγ2ΔPH-EFnFL band, which was assigned an arbitrary value of 1. These data demonstrate that rPLCγ1ΔPHnFL and rPLCγ2ΔPH-EFnFL proteins were equally loaded in each lane. (B) The same serial dilutions of mixed COS-7 cell lysates were subjected to Western blot analysis with a mixture of PLCγ1- and PLCγ2-specific antibodies. Note that endogenous PLCγ1 and PLCγ2 are also detected by these antibodies. Numbers under each lane indicate the density of the rPLCγ1ΔPHnFL and rPLCγ2ΔPH-EFnFL bands relative to that of the rPLCγ2ΔPH-EFnFL band, which was assigned an arbitrary value of 1. These data demonstrate that the anti-PLCγ1 antibody recognizes PLCγ1 about three times better than the anti-PLCγ2 antibody recognizes PLCγ2. (C) Increasing amounts of undiluted (top) or 1:70 diluted (bottom) highly purified mouse platelet lysate were subjected to Western blot analysis with antibodies specific for PLCγ1 (top) or PLCγ2 (bottom). Numbers under each lane indicate the density of each band. Note that approximately 140X more platelet lysate was required to achieve a PLCγ1 band intensity equivalent to that of PLCγ2. Together with the finding that anti-PLCγ1 recognizes PLCγ1 approximately 3X better than anti-PLCγ2 recognizes PLCγ2, we conclude that mouse platelets have ~400X less PLCγ1 than PLCγ2.

doi:10.1371/journal.pone.0119739.g002

express either PLCγ1 or PLCγ2. These results confirmed the specific depletion of the relevant PLCγ isoform(s) in the deficient mice, and also demonstrated that the absence of one of the PLCγ isoforms does not affect the level of expression of the other isoform. Platelet counts in PLCγ1- and/or PLCγ2-deficient mice were normal (data not shown), which indicates that PLCγ is not required for megakaryopoiesis or platelet maturation in mice. In addition, expression levels of relevant major platelet receptors, including GPVI, αIIbβ3, GPIb/V/IX and α2β1, were not affected by the absence of PLCγ1 and/or PLCγ2 (S1 Table), which suggests that PLCγ1 and PLCγ2 are not required for expression of these major platelet receptors.

To investigate the relative roles of PLCγ1 and PLCγ2 in collagen-induced platelet activation, platelets from wild-type, PLCγ1-deficient, PLCγ2-deficient and PLCγ1/γ2 double-deficient mice were isolated, and collagen-triggered platelet aggregation was examined. As a positive control, platelets were also stimulated with 5 μg/ml thrombin receptor activating peptide (TRAP), which activates platelets through a G protein-coupled receptor (GPCR) pathway that relies on PLCβ for generation of IP<sub>3</sub> and DAG. As shown in Fig. 3B, platelets from PLCγ2-



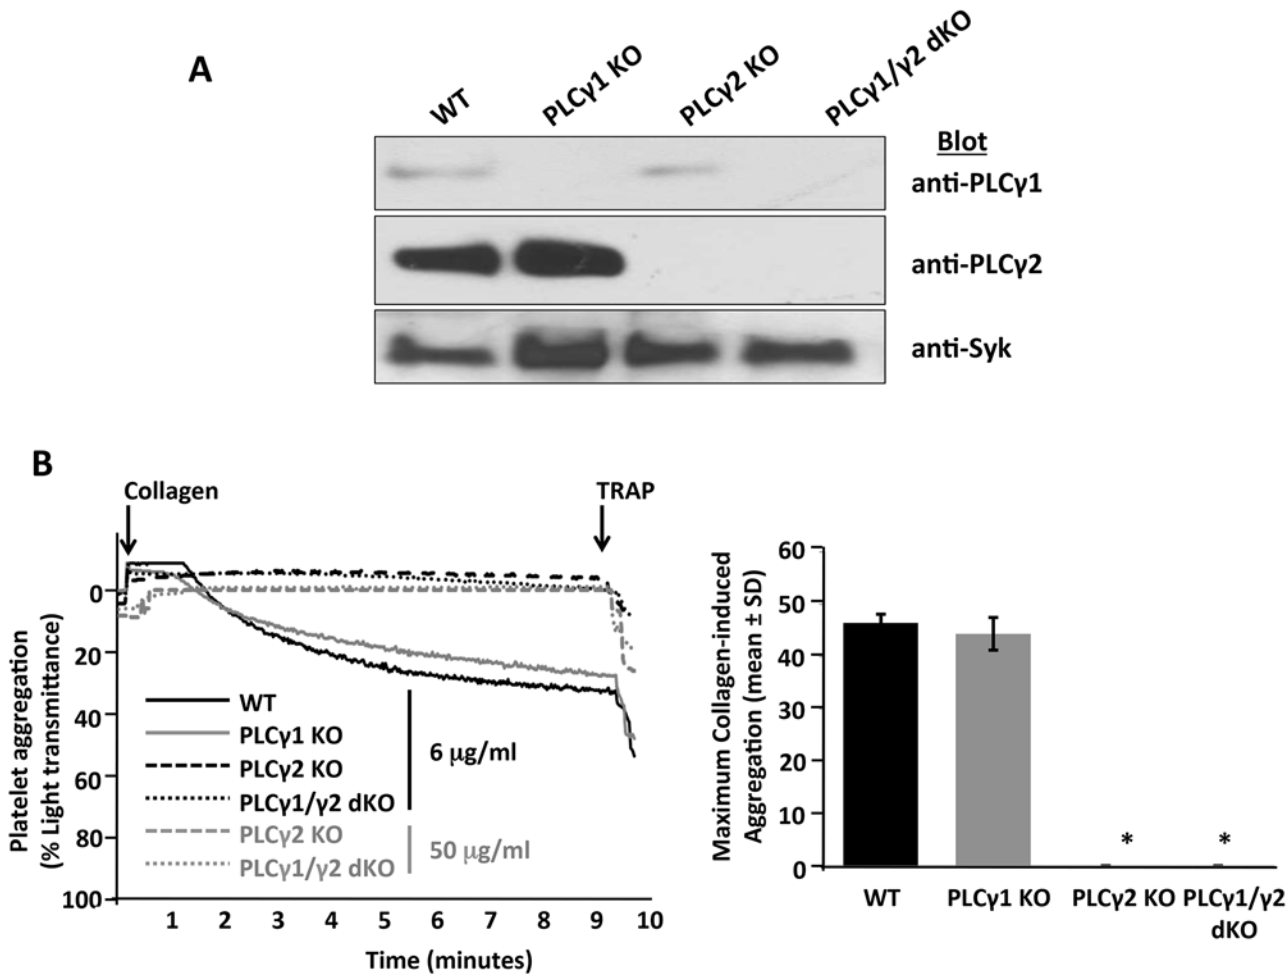

**Fig 3. Effect of PLC $\gamma$ 1 or/and PLC $\gamma$ 2 deficiency on platelet aggregation in response to collagen stimulation.** (A) Expression levels of PLC $\gamma$ 1 and PLC $\gamma$ 2 in platelets from wild-type (WT), PLC $\gamma$ 1-deficient (PLC $\gamma$ 1 KO), PLC $\gamma$ 2-deficient (PLC $\gamma$ 2 KO) and PLC $\gamma$ 1/ $\gamma$ 2 double-deficient (PLC $\gamma$ 1/ $\gamma$ 2 dKO) mice. Platelets were isolated from whole blood based on the standard platelet isolation protocol. Total cell lysates were used for direct Western blot analysis using antibodies specific for PLC $\gamma$ 1, PLC $\gamma$ 2 and Syk. (B) Washed platelets from WT, PLC $\gamma$ 1-deficient (PLC $\gamma$ 1 KO), PLC $\gamma$ 2-deficient (PLC $\gamma$ 2 KO) and PLC $\gamma$ 1/ $\gamma$ 2 double-deficient (PLC $\gamma$ 1/ $\gamma$ 2 dKO) mice were stimulated under stirring conditions with collagen at a final concentration of 6  $\mu$ g/ml (black lines) or 50  $\mu$ g/ml (gray lines). Thrombin receptor activating peptide (TRAP; 5  $\mu$ g/ml) was added at 5 minutes as a positive control. Results were recorded on a Chrono-log Platelet Aggregometer. A representative aggregometry plot (adjusted for the timing of addition of collagen and TRAP) is shown on the left, and quantitative analysis of maximum aggregation induced by collagen (6  $\mu$ g/ml) observed in three independent experiments is shown on the right (\* $p$  < 0.0001 relative to WT). Note that loss of PLC $\gamma$ 2 abrogates, but loss of PLC $\gamma$ 1 has no effect on, collagen-induced platelet aggregation.

doi:10.1371/journal.pone.0119739.g003

deficient and PLC $\gamma$ 1/ $\gamma$ 2 double-deficient mice were unable to aggregate in response to low (6  $\mu$ g/ml) or high concentrations (50  $\mu$ g/ml) of collagen. In contrast, PLC $\gamma$ 1-deficient platelets aggregated to the same extent in response to collagen stimulation as did wild-type platelets (Fig. 3B). These data indicate that PLC $\gamma$ 2 is required for collagen-induced platelet aggregation and that PLC $\gamma$ 1 normally plays no role in this process.

Platelet thrombus formation on collagen-coated surfaces under conditions of arterial shear stress requires adhesion by the GPIb/V/IX complex to VWF and subsequent activation by the GPVI collagen receptor. Whereas PLC $\gamma$ 2 deficiency has previously been shown to diminish thrombus formation on collagen-coated surfaces,[28] the effect of PLC $\gamma$ 1 deficiency on thrombus formation has not previously been evaluated. We used a whole-blood microfluidic perfusion system to examine the relative contributions of PLC $\gamma$ 1 and PLC $\gamma$ 2 to platelet adhesion

and thrombus formation on a fibrillar collagen-coated surface under conditions of arterial shear.[29] Platelets in whole blood were labeled with mepacrine, and accumulation of fluorescent platelets on collagen-coated surfaces was used to quantify adhesion and thrombus generation. As shown in Fig. 4, PLC $\gamma$ 1-deficient platelets formed thrombi that were comparable to those formed by wild-type platelets, whereas platelets from either PLC $\gamma$ 2-deficient or PLC $\gamma$ 1/ $\gamma$ 2 double-deficient mice, which adhered to collagen-coated surfaces relatively normally (data not shown), failed to form thrombi. These data indicate that PLC $\gamma$ 2 is required for thrombus formation initiated by collagen, and that PLC $\gamma$ 1 plays little, if any, role in this process.

### Deficiency of PLC $\gamma$ 2, but not PLC $\gamma$ 1, abrogates $\alpha$ IIB $\beta$ 3-mediated platelet spreading

PLC $\gamma$ 2-deficient mice exhibit residual  $\alpha$ IIB $\beta$ 3-mediated platelet activation,[17–20] raising the possibility that PLC $\gamma$ 1 contributes to this process. To determine the relative contributions of PLC $\gamma$ 1 and PLC $\gamma$ 2 to platelet activation by  $\alpha$ IIB $\beta$ 3, we first examined the effect of PLC $\gamma$ 1 and/or PLC $\gamma$ 2 deficiency on the ability of platelets to spread on fibrinogen-coated surfaces. As shown in Fig. 5A, PLC $\gamma$ 1-deficient platelets spread to a similar extent as did wild-type platelets on immobilized fibrinogen whereas platelets from PLC $\gamma$ 2-deficient and PLC $\gamma$ 1/ $\gamma$ 2 double-deficient mice failed to spread. Quantitative analysis of platelet spreading revealed that neither the area nor the percentage of spread platelets differed significantly between wild-type and PLC $\gamma$ 1-deficient platelets, whereas both the area and percentage of spread platelets from PLC $\gamma$ 2-deficient and PLC $\gamma$ 1/ $\gamma$ 2 double-deficient mice were significantly reduced relative to that observed with platelets from wild-type mice (Fig. 5B). Platelet spreading on immobilized fibrinogen requires that soluble agonists, such as ADP secreted from platelet granules, bind to GPCRs that activate  $\alpha$ IIB $\beta$ 3 via an inside-out signaling process that relies on activation of PLC $\beta$ . [15, 30] To determine whether PLC $\gamma$ 2 is required for  $\alpha$ IIB $\beta$ 3-mediated secretion of platelet granule contents, we measured the concentrations of the platelet  $\alpha$ -granule protein, platelet factor 4 (PF4), in releasates of wild-type, PLC $\gamma$ 1-deficient, PLC $\gamma$ 2-deficient or PLC $\gamma$ 1/ $\gamma$ 2 double-deficient platelets following incubation on fibrinogen-coated surfaces for 60 minutes at room temperature.[31, 32] We found that both wild-type and PLC $\gamma$ 1-deficient platelets released PF4 normally, whereas PLC $\gamma$ 2-deficient and PLC $\gamma$ 1/ $\gamma$ 2 double-deficient platelets did not secrete PF4, when allowed to spread on immobilized fibrinogen (Fig. 5C). These data indicate that PLC $\gamma$ 2 is required for  $\alpha$ IIB $\beta$ 3-dependent platelet spreading on fibrinogen, and that PLC $\gamma$ 1 plays no role in this process.

To determine whether PLC $\gamma$ 2 is required only for granule secretion or if it is also required for  $\alpha$ IIB $\beta$ 3-mediated platelet spreading once  $\alpha$ IIB $\beta$ 3 has been activated in response to secreted agonists, we assessed the ability of exogenous ADP to restore spreading of PLC $\gamma$ 2-deficient and PLC $\gamma$ 1/ $\gamma$ 2 double-deficient platelets on immobilized fibrinogen. PLC $\gamma$ 2-deficient and PLC $\gamma$ 1/ $\gamma$ 2 double-deficient platelets spread on fibrinogen (Fig. 6A, B) and secreted granule contents (Fig. 6C) to the same extent as did wild-type and PLC $\gamma$ 1-deficient platelets after 60 minutes in the presence of ADP. The slightly but significantly lower levels of spreading exhibited by PLC $\gamma$ 2-deficient and PLC $\gamma$ 1/ $\gamma$ 2 double-deficient relative to WT and PLC $\gamma$ 1-deficient platelets at earlier time points is consistent with a role for PLC2 in amplification of ADP-induced granule secretion and subsequent spreading of platelets on immobilized fibrinogen. Taken together, these data indicate that, in the process of  $\alpha$ IIB $\beta$ 3-dependent platelet spreading on fibrinogen, PLC $\gamma$ 2 is required for release of soluble agonists from platelet granules, which then bind to GPCRs and enable activation of  $\alpha$ IIB $\beta$ 3 so that it can support platelet spreading.

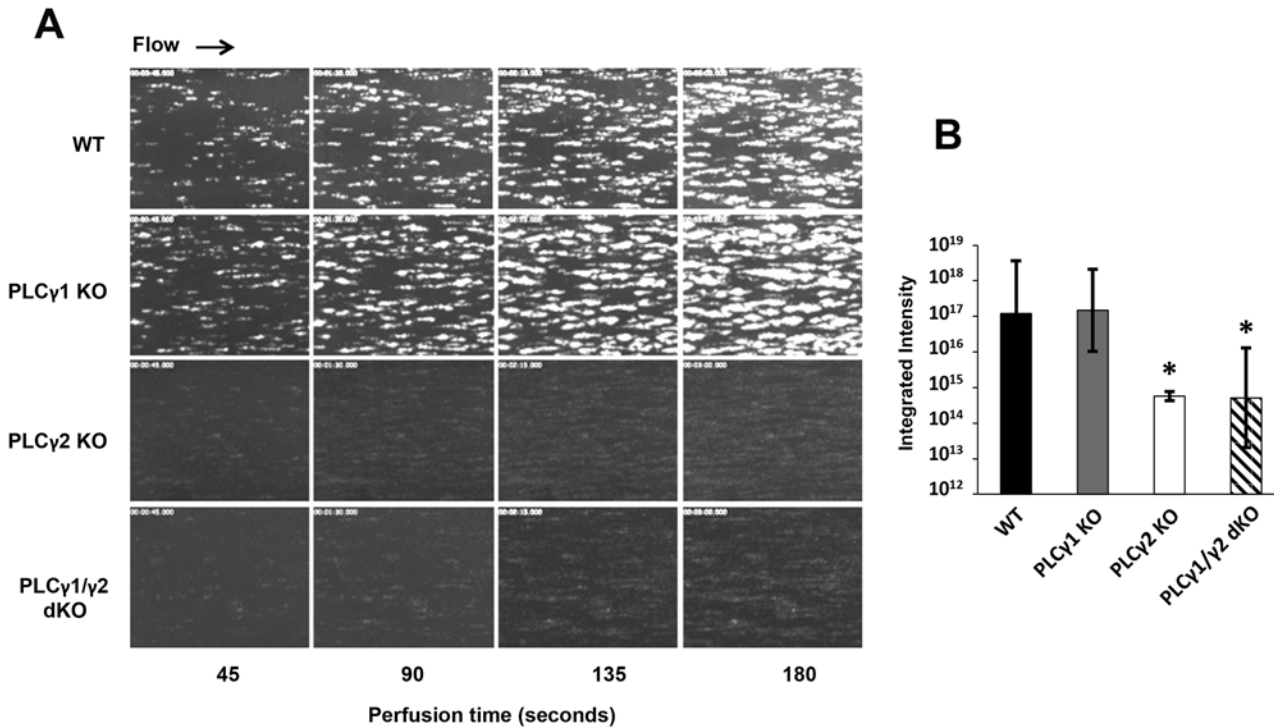

**Fig 4. Effect of PLC $\gamma$ 1 or/and PLC $\gamma$ 2 deficiency on platelet thrombus formation on collagen.** Laminar flow chambers were coated with 50  $\mu$ g/ml of type I fibrillar collagen and blocked with Hank's Balancing Salt Solution containing 0.1% BSA. Whole blood from WT, PLC $\gamma$ 1-deficient (PLC $\gamma$ 1 KO), PLC $\gamma$ 2-deficient (PLC $\gamma$ 2 KO) and PLC $\gamma$ 1/ $\gamma$ 2 double-deficient (PLC $\gamma$ 1/ $\gamma$ 2 dKO) mice was anticoagulated with heparin and PPACK, labeled with mepacrine, and perfused under conditions of arterial (1333s<sup>-1</sup>) shear. Images of platelet adhesion and accumulation were acquired using epifluorescence microscopy in real-time at a rate of one frame per second. (A) Representative images of platelet adhesion and accumulation over time. Data shown are representative of 3–4 independent experiments. (B) Platelet thrombi formed at 180 seconds in 3–4 independent experiments were quantified using MetaMorph software. Results are expressed as mean total integrated fluorescence intensity  $\pm$  SD, which is presented on a log scale on the y-axis. Statistically significant differences between the means were determined using Student's t test. Note that PLC $\gamma$ 1-deficient platelets formed thrombi normally on collagen-coated surfaces under conditions of shear stress, whereas PLC $\gamma$ 2-deficient and PLC $\gamma$ 1/ $\gamma$ 2 double-deficient platelets formed significantly smaller thrombi (\**p* < 0.05 relative to WT).

doi:10.1371/journal.pone.0119739.g004

### Over-expression of PLC $\gamma$ 1 restores the defects in platelet activation caused by PLC $\gamma$ 2 deficiency

Collectively, the data presented thus far demonstrate that PLC $\gamma$ 2 is required for platelet activation by GPVI and  $\alpha$ IIB $\beta$ 3, and that PLC1 normally plays no role in signal transduction by these receptors. To determine whether the low levels at which PLC $\gamma$ 1 is normally expressed are responsible for its inability to participate in platelet activation, we used a strategy involving retrovirus-mediated gene transfer and bone marrow reconstitution to generate mice with platelets that overexpressed PLC $\gamma$ 1. [26] PLC $\gamma$ 1/ $\gamma$ 2 double-deficient bone marrow cells were transduced *in vitro* with a retrovirus encoding PLC $\gamma$ 1, an internal ribosome entry site (IRES), and green fluorescent protein (GFP). PLC $\gamma$ 1/ $\gamma$ 2 double-deficient bone marrow cells were also transduced with a retrovirus encoding IRES-GFP alone as a negative control, or with a retrovirus encoding PLC $\gamma$ 2-IRES-GFP as a positive control. As a second positive control, bone marrow cells from wild-type mice were transduced with a retrovirus encoding GFP. Transduced bone marrow cells were transplanted into lethally irradiated C57BL/6 wild-type mice. Following reconstitution, platelets from the recipients were analyzed for GFP positivity by flow cytometry to determine transduction efficiency. 11% of platelets were GFP-positive in mice reconstituted with IRES-GFP-transduced wild-type bone marrow, and the percent of GFP-positive platelets in mice reconstituted with retrovirally transduced PLC $\gamma$ 1/ $\gamma$ 2 double-deficient bone marrow was

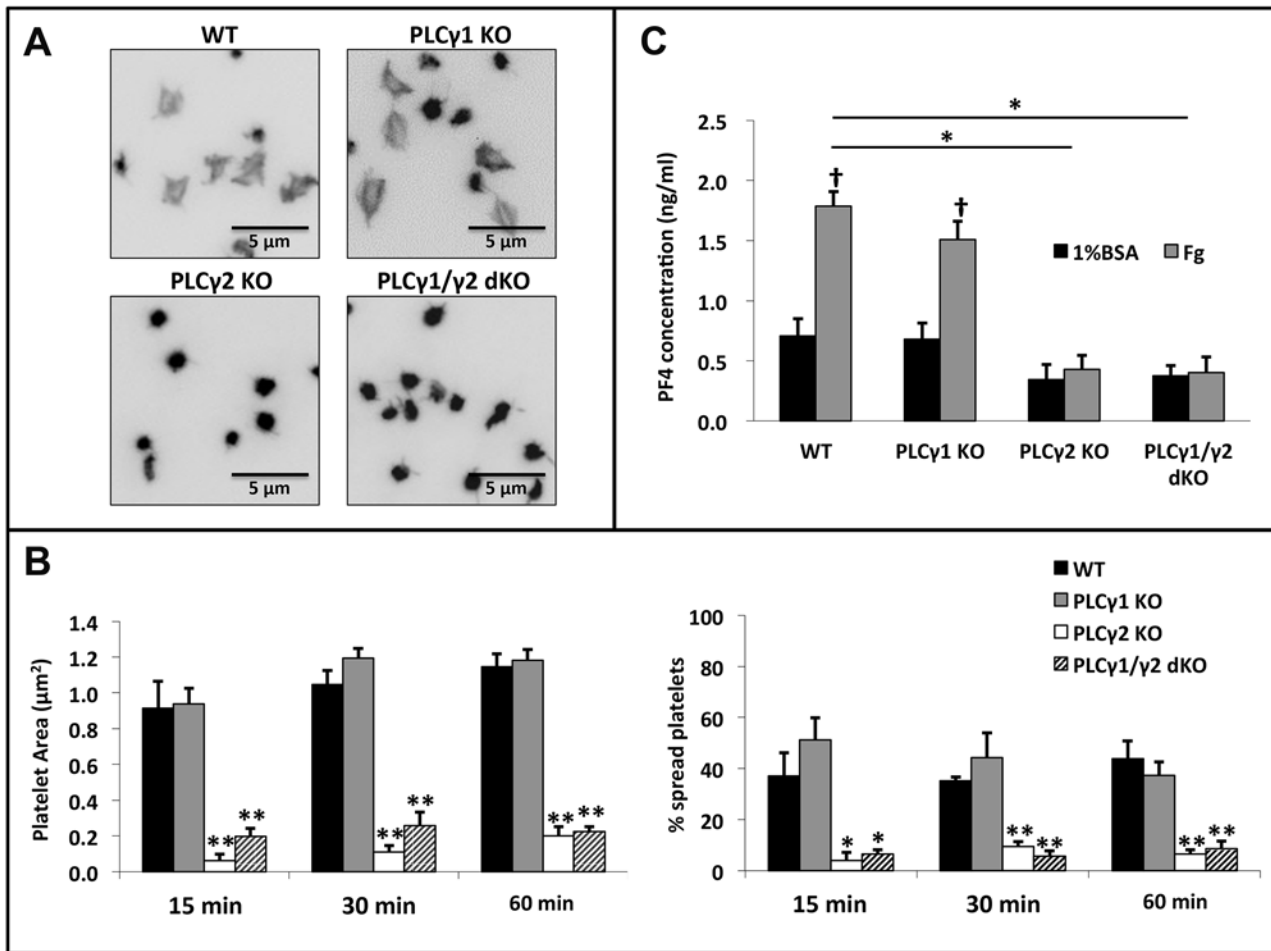

**Fig 5. Effect of PLC $\gamma$ 1 or/and PLC $\gamma$ 2 deficiency on platelet spreading and granule secretion on immobilized Fg.** (A) Washed platelets from WT, PLC $\gamma$ 1-deficient (PLC $\gamma$ 1 KO), PLC $\gamma$ 2-deficient (PLC $\gamma$ 2 KO) and PLC $\gamma$ 1/ $\gamma$ 2 double-deficient (PLC $\gamma$ 1/ $\gamma$ 2 dKO) mice were plated onto 8-chamber glass tissue-culture slides coated with Fg (3  $\mu\text{g}/\text{ml}$ ), and allowed to spread for up to 60 minutes at 37°C. Platelets were fixed, permeabilized, and stained for F-actin using TRITC-Phalloidin. (B) Quantitative analysis of mouse platelets spread on immobilized Fg. Platelet spreading was quantified using Metamorph software (for each genotype, at least 200 platelets were analyzed), platelet spreading area ( $\mu\text{m}^2$ ) and percentage (%) are shown. Results are reported as mean  $\pm$  S.D. from 3 independent experiments using 3 different groups of mice. (C) Assessment of granule secretion from spread platelets. Supernatants of platelets allowed to spread on fibrinogen for 60 minutes were collected and assayed for PF4 concentration by ELISA. Results are reported as mean  $\pm$  S.D. from 3 independent experiments (\* $p < 0.001$ , \*\* $p < 0.0001$  for each genotype relative to wildtype; † $p < 0.0005$  for Fg relative to 1% BSA). Note that platelets from PLC $\gamma$ 2-deficient or PLC $\gamma$ 1/ $\gamma$ 2 double-deficient mice showed a significant reduction in platelet spreading and granule secretion on immobilized Fg when compared to WT and PLC $\gamma$ 1-deficient platelets.

doi:10.1371/journal.pone.0119739.g005

32% for PLC $\gamma$ 1-IRES-GFP, 49% for PLC $\gamma$ 2-IRES-GFP, and 29% for IRES-GFP. Levels of expression of PLC $\gamma$ 1 and PLC $\gamma$ 2 in platelets obtained from reconstituted mice were determined by Western blot analysis. As shown in Fig 7A, transduction of PLC $\gamma$ 1/ $\gamma$ 2 double-deficient platelets with the PLC $\gamma$ 1-encoding retrovirus resulted in much higher levels of expression of PLC1 than were observed in wild-type platelets, whereas PLC2-transduced PLC $\gamma$ 1/ $\gamma$ 2 double-deficient platelets expressed PLC $\gamma$ 2 at a level that was slightly lower than that observed in wild-type platelets. To quantify the relative levels of PLC $\gamma$ 1 and PLC $\gamma$ 2 in platelets obtained from reconstituted mice, increasing amounts of undiluted or 1:70 diluted lysates of highly purified mouse platelets were subjected to Western blot analysis with antibodies specific for PLC $\gamma$ 1 or PLC $\gamma$ 2, respectively. As shown in S1 Fig, densitometric analysis of the PLC $\gamma$ 1/PLC $\gamma$ 2 blots of platelet lysates revealed that levels of PLC $\gamma$ 1 in platelets from PLC $\gamma$ 1/ $\gamma$ 2 double-deficient mice

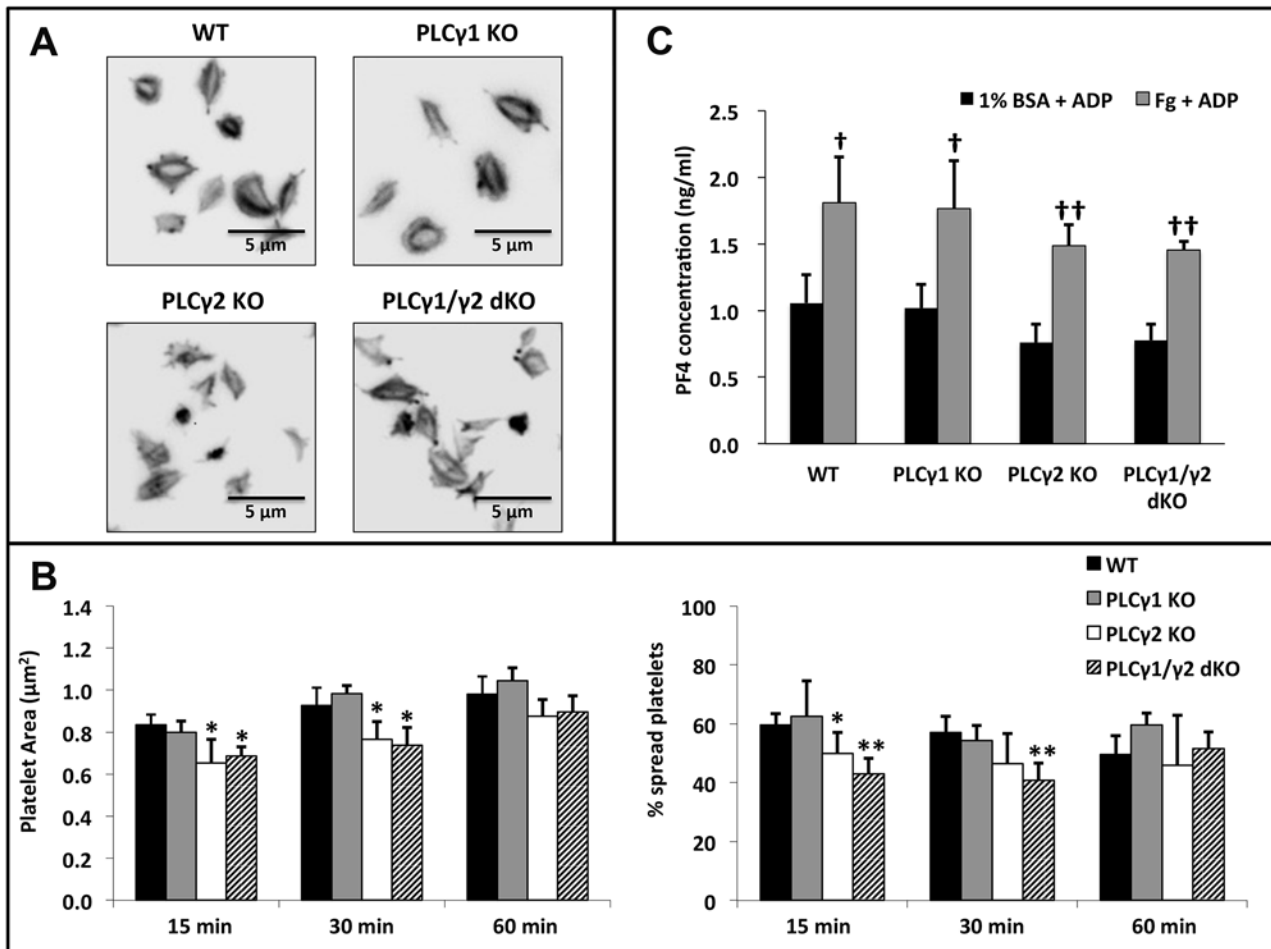

**Fig 6. Effect of PLC $\gamma$ 1 or/and PLC $\gamma$ 2 deficiency on platelet spreading and granule secretion on immobilized Fg in the presence of ADP.** Washed platelets from WT, PLC $\gamma$ 1-deficient (PLC $\gamma$ 1 KO), PLC $\gamma$ 2-deficient (PLC $\gamma$ 2 KO) and PLC $\gamma$ 1/ $\gamma$ 2 double-deficient (PLC $\gamma$ 1/ $\gamma$ 2 dKO) mice were allowed to spread on Fg (3  $\mu$ g/ml) in the presence of 20  $\mu$ M ADP for up to 60 minutes at 37°C. (A) Platelets were fixed, permeabilized, and stained for F-actin using TRITC-Phalloidin. (B) Quantitative analysis of mouse platelets spread on immobilized Fg. Platelet spreading was quantified using Metamorph software (for each genotype, at least 200 platelets were analyzed), platelet spreading area ( $\mu$ m<sup>2</sup>) and percentage (%) are shown. Results are reported as mean  $\pm$  S.D. from 3 independent experiments using 3 different groups of mice. (C) Assessment of granule secretion from spread platelets. Supernatants of platelets allowed to spread on fibrinogen in the presence of ADP for 60 minutes were collected and assayed for PF4 concentration by ELISA. Results are reported as mean  $\pm$  S.D. from 3 independent experiments (\* $p$  < 0.05, \*\* $p$  < 0.001 for each genotype relative to wildtype; <sup>†</sup> $p$  < 0.05, <sup>††</sup> $p$  < 0.005 for Fg + ADP relative to 1% BSA + ADP). Note that the failure of PLC $\gamma$ 2-deficient or PLC $\gamma$ 1/ $\gamma$ 2 double-deficient platelets to spread or release granule contents on immobilized Fg was overcome by addition of exogenous ADP.

doi:10.1371/journal.pone.0119739.g006

reconstituted with PLC $\gamma$ 1 retrovirus-transduced bone marrow (32% of which were GFP- and presumably PLC $\gamma$ 1-positive) were approximately 140 times higher than the levels at which endogenous PLC $\gamma$ 1 was expressed in wild-type platelets (e.g., the PLC $\gamma$ 1 band intensity in 20  $\mu$ l of undiluted wild-type platelet lysate was equivalent to the PLC $\gamma$ 1 band intensity observed with 10  $\mu$ l of 1:70 diluted PLC $\gamma$ 1-reconstituted platelet lysate). Levels of PLC $\gamma$ 2 in platelets from PLC $\gamma$ 1/ $\gamma$ 2 double-deficient mice reconstituted with PLC $\gamma$ 2 retrovirus-transduced bone marrow (49% of which were GFP- and presumably PLC $\gamma$ 2-positive), in contrast, were equivalent to the levels at which endogenous PLC $\gamma$ 2 was expressed in wild-type platelets (i.e., the PLC $\gamma$ 2 band intensity of 1:70 diluted wild-type platelet lysate was within ~70–80% that of the PLC $\gamma$ 2 band intensity of 1:70 diluted PLC $\gamma$ 2-reconstituted platelet lysate). Finally, the finding that similar amounts of platelet lysate were required to achieve a PLC $\gamma$ 1 band intensity equivalent to that of



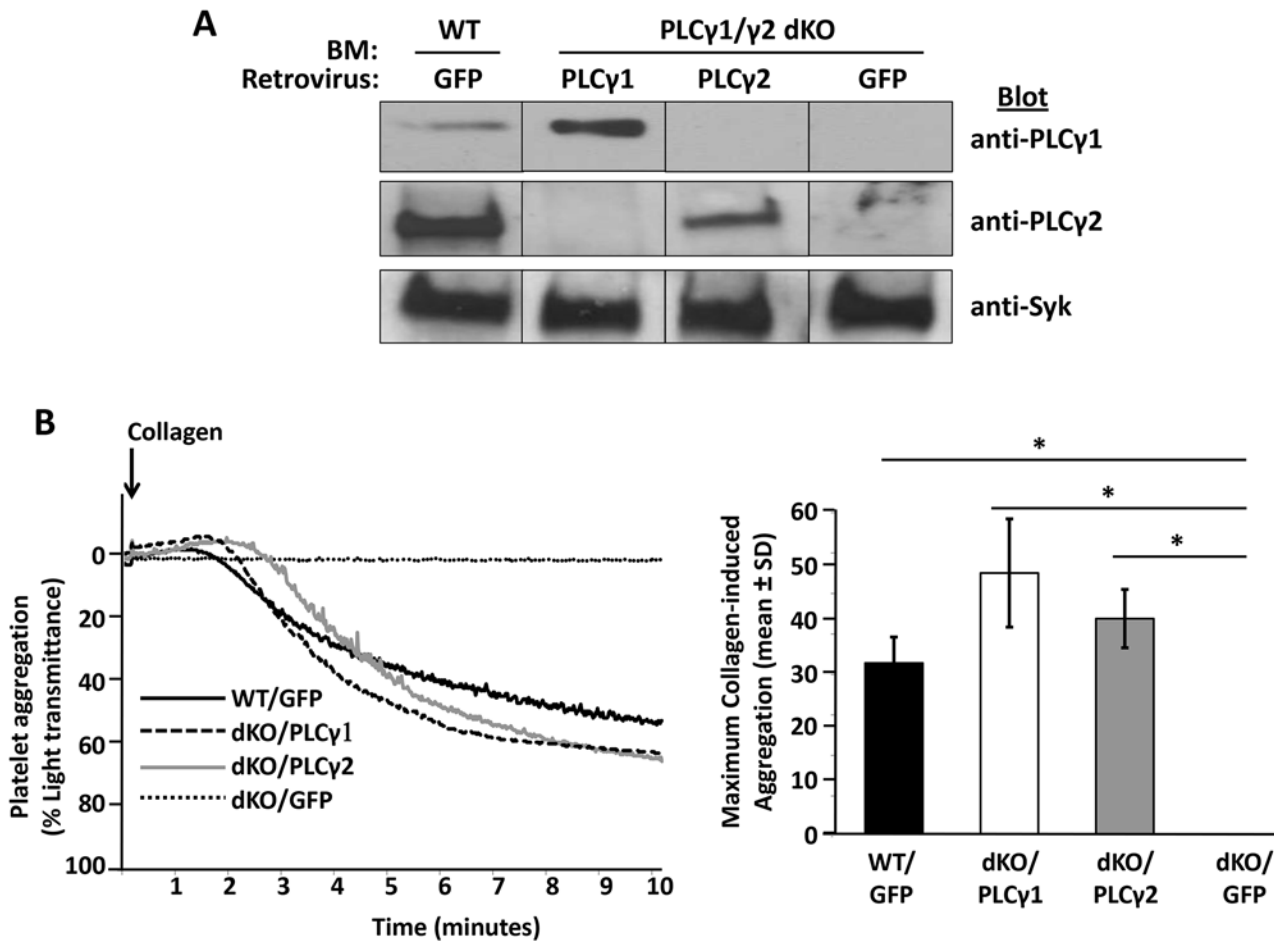

**Fig 7. Restoration of collagen-induced platelet aggregation by enforced expression of PLCγ1 in PLCγ1/γ2 double-deficient platelets.** Lethally irradiated wild-type (WT) mice were reconstituted with WT bone marrow transfected with IRES-GFP retroviruses (WT/GFP) or with PLCγ1/γ2 double-deficient bone marrow transfected with IRES-GFP retroviruses (dKO/GFP), PLCγ1-IRES-GFP retroviruses (dKO/PLCγ1), or PLCγ2-IRES-GFP retroviruses (dKO/PLCγ2). Recipient mice were analyzed 8 weeks after reconstitution. (A) Overexpression of PLCγ1 or PLCγ2 in PLCγ1/γ2 double-deficient platelets. Washed non-sorted platelets from reconstituted recipients were subjected to direct Western blot analysis with antibodies specific for PLCγ1, PLCγ2 and Syk. (B) Washed non-sorted platelets from reconstituted recipients were stimulated under stirring conditions with collagen (6 μg/ml). Results were recorded on a Chrono-log Platelet Aggregometer. A representative aggregometry plot (adjusted for the timing of addition of collagen) is shown on the left, and quantitative analysis of the results of two independent experiments is shown on the right (\*p < 0.005 for each genotype relative to dKO/GFP). Note that defective collagen-induced platelet aggregation was overcome by enforced expression of either PLCγ1 or PLCγ2 in PLCγ1/γ2 double-deficient platelets.

doi:10.1371/journal.pone.0119739.g007

PLCγ2 (e.g., the PLCγ1 band intensity in 10 μl of 1:70 diluted PLCγ1-reconstituted platelet lysate was equivalent to the PLCγ2 band intensity observed with 10 μl of 1:70 diluted PLCγ2-reconstituted or wild-type platelet lysate), together with the finding that anti-PLCγ1 recognizes PLCγ1 approximately 3 times better than anti-PLCγ2 recognizes PLCγ2 (see Fig. 1, above), indicates that the level at which PLCγ1 was expressed in PLCγ1-reconstituted platelets was much closer (3X rather than 400X less) to the level at which PLCγ2 was expressed in either wild-type or PLCγ2-reconstituted platelets.

To determine whether PLCγ1, when expressed at levels only 3 times less than that of PLCγ2 in WT platelets, can support platelet activation by GPVI and αIIbβ3, we examined the ability of reconstituted platelets, which represent a heterogeneous population of transduced and non-transduced platelets, to aggregate in response to collagen stimulation and spread on immobilized fibrinogen. As shown in Fig. 7B, whereas platelets from mice reconstituted with

IRES-GFP-transduced PLC $\gamma$ 1/ $\gamma$ 2-deficient bone marrow (dKO/GFP) failed to aggregate in response to collagen stimulation, platelets from mice reconstituted with PLC $\gamma$ 1-transduced PLC $\gamma$ 1/ $\gamma$ 2-deficient bone marrow (dKO/PLC $\gamma$ 1) aggregated to a similar extent as did platelets from mice reconstituted with GFP-transduced WT bone marrow (WT/GFP) or with PLC $\gamma$ 2-transduced PLC $\gamma$ 1/ $\gamma$ 2-deficient bone marrow (dKO/PLC $\gamma$ 2). Similarly, as shown in Fig. 8, whereas platelets from mice reconstituted with GFP-transduced PLC $\gamma$ 1/ $\gamma$ 2-deficient bone marrow (dKO/GFP) failed to spread on immobilized fibrinogen, platelets from mice reconstituted with PLC $\gamma$ 1-transduced PLC $\gamma$ 1/ $\gamma$ 2-deficient bone marrow (dKO/PLC $\gamma$ 1) spread to the same extent as did platelets from mice reconstituted with GFP-transduced WT bone marrow (WT/GFP) or with PLC $\gamma$ 2-transduced PLC $\gamma$ 1/ $\gamma$ 2-deficient bone marrow (dKO/PLC $\gamma$ 2). The homogenous spreading response of dKO/PLC $\gamma$ 1 and dKO/PLC $\gamma$ 2 platelets, despite transduction efficiencies of only 32% for 49% for PLC $\gamma$ 1- and PLC $\gamma$ 2-reconstituted mice, respectively, is likely explained by a paracrine effect of ADP released from the successfully transduced platelets on the non-transduced platelet population. Taken together, these data demonstrate that, when expressed at sufficiently high levels, PLC $\gamma$ 1 can fully support GPVI- and  $\alpha$ IIB $\beta$ 3-dependent platelet responses.

## Discussion

In this report, we use PLC $\gamma$ 1-deficient, PLC $\gamma$ 2-deficient, and PLC $\gamma$ 1/2-double deficient mice to elucidate the roles of PLC $\gamma$ 1 and PLC $\gamma$ 2 in platelet activation. Our findings confirm previous reports that PLC $\gamma$ 2 is required for collagen/GPVI-mediated platelet aggregation, GPVI-dependent thrombus formation on collagen under conditions of shear, and  $\alpha$ IIB $\beta$ 3-mediated platelet spreading on immobilized fibrinogen.[17–20, 22–24] Moreover, PLC $\gamma$ 2 is indispensable for platelet granule secretion downstream of adhesive interactions mediated by  $\alpha$ IIB $\beta$ 3, which is required for spreading on fibrinogen. Addition of exogenous ADP rescues defective spreading of PLC $\gamma$ 2-deficient platelets on fibrinogen, which indicates that absence of PLC $\gamma$ 2 does not affect the function of the spreading machinery. Our studies also reveal that mouse platelets contain approximately 400 times more PLC $\gamma$ 2 than PLC1, and that expression of PLC1 at levels normally achieved by PLC $\gamma$ 2 can fully restore both GPVI-dependent aggregation and  $\alpha$ IIB $\beta$ 3-dependent spreading in platelets that lack PLC $\gamma$ 2. Taken together, these data demonstrate that platelet activation by GPVI and  $\alpha$ IIB $\beta$ 3 normally requires PLC $\gamma$ 2, but that PLC $\gamma$ 1, which is normally expressed at levels that are insufficient to support these processes, can fully support platelet activation if it is expressed at sufficiently high levels.

Our findings are completely compatible with results of previous studies demonstrating that PLC $\gamma$ 2-deficiency abrogated platelet responses to GPVI-specific stimuli and diminished platelet thrombus formation on von Willebrand factor under flow conditions.[14, 17–20, 28] However, our results contrast with previous reports that PLC $\gamma$ 2-deficient platelets were only partially impaired in their ability to retract a fibrin clot or to fully spread on immobilized fibrinogen[22–24] and that, whereas PLC $\gamma$ 2-deficient platelets failed to respond to GPVI-specific agonists, they were able to mount responses to collagen[17, 33]. The partial responses of PLC $\gamma$ 2-deficient platelets to fibrinogen observed in previous studies may have been due to the presence of trace amounts of GPCR agonists, which we found to be able to bypass the need for PLC $\gamma$ 2 in  $\alpha$ IIB $\beta$ 3-dependent activation of platelets. The explanation for differences in the extent to which we and others detected responses of PLC $\gamma$ 2-deficient platelets to collagen is not known, but may be attributable to the different sources of collagen used to stimulate platelets. Our findings that PLC $\gamma$ 2-deficiency abrogated, and PLC $\gamma$ 1 deficiency had no effect on, either platelet spreading on fibrinogen or thrombus formation on collagen under conditions of shear

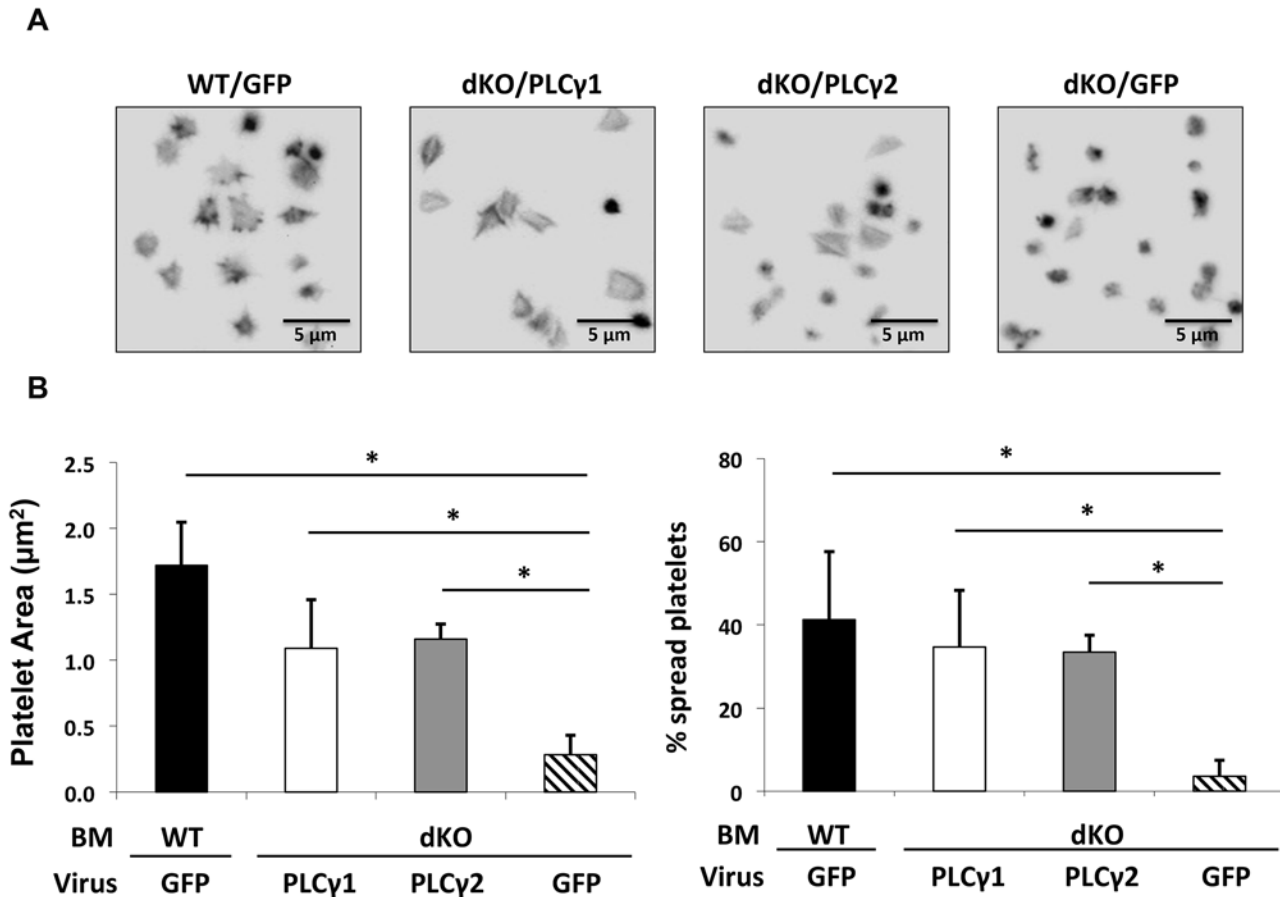

**Fig 8. Restoration of  $\alpha\text{IIb}\beta_3$ -mediated platelet spreading on Fg by enforced expression of PLC $\gamma$ 1 or PLC $\gamma$ 2 in PLC $\gamma$ 1/ $\gamma$ 2 double-deficient platelets.** Lethally irradiated wild-type (WT) mice were reconstituted with WT bone marrow transfected with IRES-GFP retroviruses (WT/GFP) or with PLC $\gamma$ 1/ $\gamma$ 2 double-deficient bone marrow transfected with IRES-GFP retroviruses (dKO/GFP), PLC $\gamma$ 1-IRES-GFP retroviruses (dKO/PLC $\gamma$ 1), or PLC $\gamma$ 2-IRES-GFP retroviruses (dKO/PLC $\gamma$ 2). Recipient mice were analyzed 8 weeks after reconstitution. (A) Washed non-sorted platelets from reconstituted recipients were allowed to spread on Fg (3  $\mu\text{g}/\text{ml}$ ) for 60 minutes at 37°C. Platelets were fixed, permeabilized, and stained for F-actin using TRITC-Phalloidin. (B) Quantitative analysis of mouse platelet spreading on immobilized Fg. Platelet spreading was quantified using Metamorph software (for each genotype, at least 300 platelets were analyzed), platelet spreading area ( $\mu\text{m}^2$ ) and percentage (%) are shown. Quantitative analysis was performed on all non-sorted platelets regardless of GFP positivity. Results are reported as mean  $\pm$  S.D. from 2 independent experiments (\* $p < 0.05$  for each genotype relative to dKO/GFP). Note that increased platelet spreading area and spreading percentage were observed in PLC $\gamma$ 1/ $\gamma$ 2 double-deficient platelets that expressed PLC $\gamma$ 2 or PLC $\gamma$ 1 at levels normally achieved by PLC $\gamma$ 2.

doi:10.1371/journal.pone.0119739.g008

definitively demonstrate that PLC $\gamma$ 1 normally plays no role in platelet activation by either fibrinogen or collagen.

Although PLC $\gamma$ 1 and PLC $\gamma$ 2 play critical roles in the responsiveness of hematopoietic cells to stimulation via immune receptors,[9] hematopoietic cells differ in the extent to which they rely on PLC $\gamma$  isoforms for development. PLC $\gamma$ 1 is the predominant PLC $\gamma$  isoform expressed in T cells, and is required for T cell development, activation and tolerance.[25] In B cells, the key signaling component downstream of the BCR is PLC $\gamma$ 2, which plays essential roles in B cell development, differentiation and function.[13, 14] Both PLC $\gamma$ 1 and PLC $\gamma$ 2 contribute to the maturation of B and T lymphocytes [26, 34, 35] and, although controversial, possibly also to the maturation of NK cells.[36, 37] Interestingly, PLC $\gamma$ 2 is highly expressed only at early stages of T cell maturation, whereas PLC $\gamma$ 1 is expressed at all stages of T cell development.[34] Similarly, during B cell development, the PLC $\gamma$ 1 isoform is highly expressed at the pro/pre-B cell stage and starts to decline in maturing B cells, whereas PLC $\gamma$ 2 expression levels remain constant at

all developmental stages.[26] Together, these findings suggest that the presence of both PLC $\gamma$  isoforms may be indispensable for the pre-BCR or pre-TCR to generate a sufficient amount of total PLC activity to drive maturation forward. Once the mature BCR or TCR is expressed on the cell surface, the major PLC isoform appears to be sufficient to enable responsiveness of mature cells. Like B cells, platelets use PLC $\gamma$ 2 as a principal signaling component in response to agonist stimulation;[19, 20, 22] however, unlike B cells, platelets require neither PLC1 nor PLC $\gamma$ 2 for development, since platelets develop normally in the absence of PLC2 alone [14] and in the absence of both PLC1 and PLC $\gamma$ 2 (present study). Other hematopoietic cells that develop normally in the absence of their major PLC isoform (PLC2) include neutrophils and macrophages.[14] The molecular mechanisms underlying the differential requirement of hematopoietic cells for PLC $\gamma$  activity during development remains to be determined.

Several types of hematopoietic cells, including bone marrow derived macrophages (BMDM),[38] dendritic cells,[39] natural killer (NK) cells,[36, 37, 40] mast cells,[14] and neutrophils,[41, 42] are like platelets in that they normally rely solely on PLC2 for signal transduction downstream of ITAM-coupled receptors. Our findings that PLC $\gamma$ 2 is 400X more abundant than is PLC $\gamma$ 1 in platelets, and that over-expression of PLC $\gamma$ 1 completely restores responsiveness of PLC $\gamma$ 2-deficient or PLC1/ $\gamma$ 2 double-deficient platelets indicates that PLC $\gamma$ 1 normally plays no role in platelet activation simply because its expression is limiting. If it is expressed at sufficiently high levels, PLC $\gamma$ 1 can fully compensate for PLC2 in platelets. This finding in platelets is different from those observed in B cell and NK cells, wherein PLC $\gamma$ 1 was only partially able to compensate for PLC $\gamma$ 2 deficiency.[26, 37] Thus, enforced expression of PLC $\gamma$ 1 in PLC $\gamma$ 2-deficient mice could restore Ca<sup>2+</sup> flux in B cells but not B cell proliferation and development (22). Similarly, PLC $\gamma$ 1 over-expression rescued expression of Ly49 receptors during late stages of maturation, restored cytotoxicity but not to wild-type levels, and failed to rescue interferon production by NK cells.[37] One possible explanation for this difference is that PLC $\gamma$ 1 and PLC $\gamma$ 2 play redundant roles with respect to some functions, but distinct roles with respect to other functions. We found that, in platelets, PLC activity is required for secretion of granule contents, upon which subsequent platelet functions such as spreading and thrombus formation depend, and that PLC $\gamma$ 1 and PLC $\gamma$ 2 are redundant with respect to their ability to induce platelet granule secretion. Whereas certain NK cell effector functions, e.g., cytotoxicity, depend on granule release, others rely on synthesis of cytokines, which requires initiation of transcription and translation. It is possible that PLC $\gamma$ 1 and PLC $\gamma$ 2 play redundant roles in induction of granule release, but that PLC $\gamma$ 2 functions uniquely with respect to transcription initiation. Additional studies of the ability of PLC $\gamma$ 1 over-expression to restore responsiveness of PLC $\gamma$ 1/ $\gamma$ 2 double-deficient cells are needed to determine the extent to which PLC $\gamma$ 1 and PLC $\gamma$ 2 play redundant vs. unique roles in the different functions attributable to platelets, NK cells, and other PLC $\gamma$ 2-reliant hematopoietic cells. Although PLC $\gamma$ 1 and PLC $\gamma$ 2 are similar with respect to domain composition and overall conformation they are only 52% identical at the amino acid level, suggesting that the inter- and intra-molecular interactions that regulate their activity may be quite different. To the extent that unique functions for PLC $\gamma$ 2 are identified, studies of chimeric forms of PLC $\gamma$ 1 and PLC $\gamma$ 2 will be necessary to determine the distinct roles of different components of each PLC $\gamma$  isoform in regulating signal transduction in different hematopoietic cell types.

## Supporting Information

**S1 Fig. Quantification of relative levels of PLC $\gamma$ 1 and PLC $\gamma$ 2 in retrovirus-transduced PLC $\gamma$ 1/ $\gamma$ 2 double-deficient platelets.** Increasing amounts of undiluted or 1:70 diluted highly purified mouse platelet lysate were subjected to Western blot analysis with antibodies specific

for PLC $\gamma$ 1 (A) or PLC $\gamma$ 2 (B). Numbers under each lane indicate the density of each band. Note that levels of over-expressed PLC $\gamma$ 1 in PLC $\gamma$ 1-encoding retrovirus-transduced PLC $\gamma$ 1/ $\gamma$ 2 double-deficient platelets were approximately 140 times more than endogenous PLC $\gamma$ 1 in wild-type platelets (A). Levels of over-expressed PLC $\gamma$ 2 in PLC $\gamma$ 2-encoding retrovirus-transduced PLC $\gamma$ 1/ $\gamma$ 2 double-deficient platelets were approximately 2 times less than endogenous PLC $\gamma$ 2 in wild-type platelets (B).

(TIF)

**S1 Table. Comparison of major platelet receptors among platelets isolated from wild-type, PLC $\gamma$ 1-deficient, PLC $\gamma$ 2-deficient and PLC $\gamma$ 1/ $\gamma$ 2 double-deficient mice.**

(TIF)

## Acknowledgments

The authors gratefully acknowledge Charles Abrams for helpful discussions. The authors thank Aniko Szabo and Alexis Visotcky for help with statistical analysis of *in vitro* thrombus formation data.

## Author Contributions

Conceived and designed the experiments: YZ TA HZ MY DKN. Performed the experiments: YZ TA HZ MY. Analyzed the data: YZ TA HZ MY RW DW PJN DKN. Contributed reagents/materials/analysis tools: RW DW PJN. Wrote the paper: YZ TA HZ MY DKN.

## References

1. Rhee SG, Bae YS. Regulation of phosphoinositide-specific phospholipase C isozymes. *J Biol Chem*. 1997; 272(24): 15045–15048. PMID: [9182519](#)
2. Berridge MJ, Lipp P, Bootman MD. The versatility and universality of calcium signalling. *Nat Rev Mol Cell Biol*. 2000; 1(1): 11–21. PMID: [11413485](#)
3. Brass LF. Ca<sup>2+</sup> homeostasis in unstimulated platelets. *J Biol Chem*. 1984; 259(20): 12563–12570. PMID: [6490630](#)
4. Liu WS and Heckman CA. The sevenfold way of PKC regulation. *Cell Signal*. 1998; 10(8): 529–542. PMID: [9794251](#)
5. Keenan C and Kelleher D. Protein kinase C and the cytoskeleton. *Cell Signal*. 1998; 10(4): 225–232. PMID: [9617479](#)
6. Suh PG, Park JI, Manzoli L, Cocco L, Peak JC, Katan M, et al. Multiple roles of phosphoinositide-specific phospholipase C isozymes. *BMB Rep*. 2008; 41(6): 415–434. PMID: [18593525](#)
7. Bunney TD, Katan M. PLC regulation: emerging pictures for molecular mechanisms. *Trends Biochem Sci*. 2011; 36(2): 88–96. doi: [10.1016/j.tibs.2010.08.003](#) PMID: [20870410](#)
8. Williams RL, Katan M. Structural views of phosphoinositide-specific phospholipase C: signalling the way ahead. *Structure*. 1996; 4(12): 1387–1394. PMID: [8994965](#)
9. Wilde JI, Watson SP. Regulation of phospholipase C $\gamma$  isoforms in haematopoietic cells: why one, not the other? *Cell Signal*. 2001; 13(10): 691–701. PMID: [11602179](#)
10. Choi JH, Ryu SH, Suh PG. On/off-regulation of phospholipase C-gamma 1-mediated signal transduction. *Adv Enzyme Regul*. 2007; 47: 104–116. PMID: [17336371](#)
11. Rhee SG. Regulation of phosphoinositide-specific phospholipase C. *Annual Review of Biochemistry*. 2001(70): 281–312. PMID: [11395409](#)
12. Ji QS, Winnier GE, Niswender KD, Horstman D, Wisdom R, Magnuson MA, et al. Essential role of the tyrosine kinase substrate phospholipase C-g1 in mammalian growth and development. *Proc Natl Acad Sci U S A*. 1997; 94(7): 2999–3003. PMID: [9096335](#)
13. Hashimoto A, Takeda K, Inaba M, Sekimata M, Kaisho T, Ikehara S, et al. Cutting edge: essential role of phospholipase C-gamma 2 in B cell development and function. *J Immunol*. 2000; 165(4): 1738–1742. PMID: [10925250](#)



14. Wang D, Feng J, Wen R, Marine JC, Sangster MY, Parganas E, et al. Phospholipase Cg2 is essential in the functions of B cell and several Fc receptors. *Immunity*. 2000; 13(1): 25–35. PMID: [10933392](#)
15. Li Z, Delaney MK, O'Brien KA, Du X. Signaling during platelet adhesion and activation. *Arterioscler. Thromb. Vasc. Biol.* 2010; 30(12): 2341–2349. doi: [10.1161/ATVBAHA.110.207522](#) PMID: [21071698](#)
16. Bergmeier W, Stefanini L. Platelet ITAM signaling. *Curr Opin Hematol.* 2013; 20(5): 445–450. doi: [10.1097/MOH.0b013e3283642267](#) PMID: [23921514](#)
17. Mangin P, Nonne C, Eckly A, Ohlmann P, Freund M, Nieswandt B, et al. A PLCg2-independent platelet collagen aggregation requiring functional association of GPVI and integrin a2b1. *FEBS Letters*. 2003; 542(1–3): 53–59. PMID: [12729916](#)
18. Nonne C, Lenain N, Hechler B, Mangin P, Cazenave JP, Gachet C, et al. Importance of platelet phospholipase Cgamma2 signaling in arterial thrombosis as a function of lesion severity. *Arterioscler. Thromb. Vasc. Biol.* 2005; 25(6): 1293–1298. PMID: [15774906](#)
19. Suzuki-Inoue K, Inoue O, Frampton J, Watson SP. Murine GPVI stimulates weak integrin activation in PLCg2<sup>-/-</sup> platelets: involvement of PLCg1 and PI3-kinase. *Blood*. 2003; 102(4): 1367–1373. PMID: [12730118](#)
20. Munnix IC, Strehl A, Kuijpers MJ, Auger JM, van der Meijden PE, van Zandvoort MA, et al. The glycoprotein VI-phospholipase Cgamma2 signaling pathway controls thrombus formation induced by collagen and tissue factor in vitro and in vivo. *Arterioscler. Thromb. Vasc. Biol.* 2005; 25(12): 2673–2678. PMID: [16254207](#)
21. Suzuki-Inoue K, Fuller GL, Garcia A, Eble JA, Pohlmann S, Inoue O, et al. A novel Syk-dependent mechanism of platelet activation by the C-type lectin receptor CLEC-2. *Blood*. 2006; 107(2): 542–549. PMID: [16174766](#)
22. Wonerow P, Pearce AC, Vaux DJ, Watson SP. A critical role for phospholipase Cg2 in allb3-mediated platelet spreading. *J. Biol. Chem.* 2003; 278(39): 37520–37529. PMID: [12832411](#)
23. Goncalves I, Hughan SC, Schoenwaelder SM, Yap CL, Yuan Y, Jackson SP. Integrin allb3-dependent calcium signals regulate platelet-fibrinogen interactions under flow: Involvement of PLCg2. *J. Biol. Chem.* 2003; 278(37): 34812–34822. PMID: [12832405](#)
24. Suzuki-Inoue K, Hughes CE, Inoue O, Kaneko M, Cuyun-Lira O, Takafuta T, et al. Involvement of Src kinases and PLCgamma2 in clot retraction. *Thromb. Res.* 2007; 120(2): 251–258. PMID: [17055557](#)
25. Fu G, Chen Y, Yu M, Podd A, Schuman J, He Y, et al. Phospholipase Cg1 is essential for T cell development, activation, and tolerance. *J. Exp. Med.* 2010; 207(2): 309–318. doi: [10.1084/jem.20090880](#) PMID: [20123962](#)
26. Wen R, Chen Y, Schuman J, Fu G, Yang S, Zhang W, et al. An important role of phospholipase Cgamma1 in pre-B-cell development and allelic exclusion. *Embo J.* 2004; 23(20): 4007–4017. PMID: [15372077](#)
27. Rowley JW, Oler AJ, Tolley ND, Hunter BN, Low EN, Nix DA, et al. Genome-wide RNA-seq analysis of human and mouse platelet transcriptomes. *Blood*. 2011; 118(14): e101–111. doi: [10.1182/blood-2011-03-339705](#) PMID: [21596849](#)
28. Rathore V, Wang D, Newman DK, Newman PJ. Phospholipase Cg2 contributes to stable thrombus formation on VWF. *Febs Lett.* 2004; 573(1–3): 26–30. PMID: [15328002](#)
29. Zhi H, Rauova L, Hayes V, Gao C, Boylan B, Newman DK, et al. Cooperative integrin/ITAM signaling in platelets enhances thrombus formation in vitro and in vivo. *Blood*. 2013; 121(10): 1858–1867. doi: [10.1182/blood-2012-07-443325](#) PMID: [23264598](#)
30. Shattil SJ, Newman PJ. Integrins: dynamic scaffolds for adhesion and signaling in platelets. *Blood*. 2004; 104(6): 1606–1615. PMID: [15205259](#)
31. Kaplan KL, Broekman MJ, Chernoff A, Lesznik GR, Drillings M. Platelet alpha-granule proteins: studies on release and subcellular localization. *Blood*. 1979; 53(4): 604–618. PMID: [426909](#)
32. Harrison P, Cramer EM. Platelet alpha-granules. *Blood Rev.* 1993; 7(1): 52–62. PMID: [8467233](#)
33. Cho MJ, Liu J, Pestina TI, Steward SA, Thomas DW, Coffman TM, et al. The roles of allb3-mediated outside-in signal transduction, thromboxane A2, and adenosine diphosphate in collagen-induced platelet aggregation. *Blood*. 2003; 101(7): 2646–2651. PMID: [12446460](#)
34. Fu G, Chen Y, Schuman J, Wang D, Wen R. Phospholipase Cgamma2 plays a role in TCR signal transduction and T cell selection. *J Immunol.* 2012; 189(5): 2326–2332. doi: [10.4049/jimmunol.1103458](#) PMID: [22837484](#)
35. Warren A, Le Couteur DG, Fraser R, Bowen DG, McCaughan GW, Bertolino P. T lymphocytes interact with hepatocytes through fenestrations in murine liver sinusoidal endothelial cells. *Hepatology*. 2006; 44(5): 1182–1190. PMID: [17058232](#)

36. Caraux A, Kim N, Bell SE, Zompi S, Ranson T, Lesjean-Pottier S, et al. Phospholipase C-gamma2 is essential for NK cell cytotoxicity and innate immunity to malignant and virally infected cells. *Blood*. 2006; 107(3): 994–1002. PMID: [16204312](#)
37. Regunathan J, Chen Y, Kutlesa S, Dai X, Bai L, Wen R, et al. Differential and nonredundant roles of phospholipase Cgamma2 and phospholipase Cgamma1 in the terminal maturation of NK cells. *J. Immunol.* 2006; 177(8): 5365–5376. PMID: [17015722](#)
38. Gorjestani S, Yu M, Tang B, Zhang D, Wang D, Lin X. Phospholipase Cgamma2 (PLCgamma2) is key component in Dectin-2 signaling pathway, mediating anti-fungal innate immune responses. *J Biol Chem.* 2011; 286(51): 43651–43659. doi: [10.1074/jbc.M111.307389](#) PMID: [22041900](#)
39. Xu S, Huo J, Lee KG, Kurosaki T, Lam KP. Phospholipase Cgamma2 is critical for Dectin-1-mediated Ca<sup>2+</sup> flux and cytokine production in dendritic cells. *J Biol Chem.* 2009; 284(11): 7038–7046. doi: [10.1074/jbc.M806650200](#) PMID: [19136564](#)
40. Tassi I, Presti R, Kim S, Yokoyama WM, Gilfillan S, Colonna M. Phospholipase C-gamma 2 is a critical signaling mediator for murine NK cell activating receptors. *J. Immunol.* 2005; 175(2): 749–754. PMID: [16002670](#)
41. Graham DB, Robertson CM, Bautista J, Mascarenhas F, Diacovo MJ, Montgrain V, et al. Neutrophil-mediated oxidative burst and host defense are controlled by a Vav-PLCgamma2 signaling axis in mice. *J Clin Invest.* 2007; 117(11): 3445–3452. PMID: [17932569](#)
42. Jakus Z, Simon E, Frommhold D, Sperandio M, Mocsai A. Critical role of phospholipase Cgamma2 in integrin and Fc receptor-mediated neutrophil functions and the effector phase of autoimmune arthritis. *J Exp Med.* 2009; 206(3): 577–593. doi: [10.1084/jem.20081859](#) PMID: [19273622](#)
